# Supplementary material for: Interaction between CD36 and FABP4 modulates adipocyte-induced fatty acid import and metabolism in breast cancer
Source: PubMed Central journal article supplement (PMC8463699; doi:10.1038/s41523-021-00324-7), 2021-09-24
Supplement: 41523_2021_324_MOESM2_ESM.pdf [file 41523_2021_324_MOESM2_ESM.pdf]

## Reporting Summary

Nature Research wishes to improve the reproducibility of the work that we publish. This form provides structure for consistency and transparency in reporting. For further information on Nature Research policies, see [Authors & Referees](#) and the [Editorial Policy Checklist](#).

### Statistics

For all statistical analyses, confirm that the following items are present in the figure legend, table legend, main text, or Methods section.

n/a Confirmed

- |                                     |                                     |                                                                                                                                                                                                                                                            |
|-------------------------------------|-------------------------------------|------------------------------------------------------------------------------------------------------------------------------------------------------------------------------------------------------------------------------------------------------------|
| <input type="checkbox"/>            | <input checked="" type="checkbox"/> | The exact sample size ( $n$ ) for each experimental group/condition, given as a discrete number and unit of measurement                                                                                                                                    |
| <input checked="" type="checkbox"/> | <input type="checkbox"/>            | A statement on whether measurements were taken from distinct samples or whether the same sample was measured repeatedly                                                                                                                                    |
| <input type="checkbox"/>            | <input checked="" type="checkbox"/> | The statistical test(s) used AND whether they are one- or two-sided<br><i>Only common tests should be described solely by name; describe more complex techniques in the Methods section.</i>                                                               |
| <input checked="" type="checkbox"/> | <input type="checkbox"/>            | A description of all covariates tested                                                                                                                                                                                                                     |
| <input type="checkbox"/>            | <input checked="" type="checkbox"/> | A description of any assumptions or corrections, such as tests of normality and adjustment for multiple comparisons                                                                                                                                        |
| <input type="checkbox"/>            | <input checked="" type="checkbox"/> | A full description of the statistical parameters including central tendency (e.g. means) or other basic estimates (e.g. regression coefficient) AND variation (e.g. standard deviation) or associated estimates of uncertainty (e.g. confidence intervals) |
| <input checked="" type="checkbox"/> | <input type="checkbox"/>            | For null hypothesis testing, the test statistic (e.g. $F$ , $t$ , $r$ ) with confidence intervals, effect sizes, degrees of freedom and $P$ value noted<br><i>Give <math>P</math> values as exact values whenever suitable.</i>                            |
| <input checked="" type="checkbox"/> | <input type="checkbox"/>            | For Bayesian analysis, information on the choice of priors and Markov chain Monte Carlo settings                                                                                                                                                           |
| <input checked="" type="checkbox"/> | <input type="checkbox"/>            | For hierarchical and complex designs, identification of the appropriate level for tests and full reporting of outcomes                                                                                                                                     |
| <input checked="" type="checkbox"/> | <input type="checkbox"/>            | Estimates of effect sizes (e.g. Cohen's $d$ , Pearson's $r$ ), indicating how they were calculated                                                                                                                                                         |

*Our web collection on [statistics for biologists](#) contains articles on many of the points above.*

### Software and code

Policy information about [availability of computer code](#)

Data collection

The Cancer Genome Atlas Database, rVista (<http://rvista.dcode.org>), CONTRA v2 (<http://www.dnbr.ugent.be/prx/bioit2-public/contrav2/index.php>), NCBI sequence finder tool, Morpheus online tool (<https://software.broadinstitute.org/morpheus/>), The molecular signature database (MsigDB) website (<http://software.broadinstitute.org/gsea/msigdb/genesets.jsp?collection=C5>).

Data analysis

GraphPad Prism 6.0 (GraphPad Software Inc.)

For manuscripts utilizing custom algorithms or software that are central to the research but not yet described in published literature, software must be made available to editors/reviewers. We strongly encourage code deposition in a community repository (e.g. GitHub). See the Nature Research [guidelines for submitting code & software](#) for further information.

### Data

Policy information about [availability of data](#)

All manuscripts must include a [data availability statement](#). This statement should provide the following information, where applicable:

- Accession codes, unique identifiers, or web links for publicly available datasets
- A list of figures that have associated raw data
- A description of any restrictions on data availability

The uncropped blots presented in this study are available in Supplementary Figure 7. All additional data is available from the corresponding author upon reasonable request.

## Field-specific reporting

Please select the one below that is the best fit for your research. If you are not sure, read the appropriate sections before making your selection.

- Life sciences     Behavioural & social sciences     Ecological, evolutionary & environmental sciences

For a reference copy of the document with all sections, see [nature.com/documents/nr-reporting-summary-flat.pdf](https://www.nature.com/documents/nr-reporting-summary-flat.pdf)

## Life sciences study design

All studies must disclose on these points even when the disclosure is negative.

|                 |                                                                                           |
|-----------------|-------------------------------------------------------------------------------------------|
| Sample size     | The in vitro cell culture experiments, we used 2-3 biological samples in each experiment. |
| Data exclusions | No data were excluded.                                                                    |
| Replication     | All attempts at replication were successful.                                              |
| Randomization   | N/A                                                                                       |
| Blinding        | Investigators were blinded to grade tumour staining                                       |

## Reporting for specific materials, systems and methods

We require information from authors about some types of materials, experimental systems and methods used in many studies. Here, indicate whether each material, system or method listed is relevant to your study. If you are not sure if a list item applies to your research, read the appropriate section before selecting a response.

### Materials & experimental systems

- |                                     |                                                                 |
|-------------------------------------|-----------------------------------------------------------------|
| n/a                                 | Involvement in the study                                        |
| <input type="checkbox"/>            | <input checked="" type="checkbox"/> Antibodies                  |
| <input type="checkbox"/>            | <input checked="" type="checkbox"/> Eukaryotic cell lines       |
| <input checked="" type="checkbox"/> | <input type="checkbox"/> Palaeontology                          |
| <input type="checkbox"/>            | <input checked="" type="checkbox"/> Animals and other organisms |
| <input checked="" type="checkbox"/> | <input type="checkbox"/> Human research participants            |
| <input type="checkbox"/>            | <input checked="" type="checkbox"/> Clinical data               |

### Methods

- |                                     |                                                    |
|-------------------------------------|----------------------------------------------------|
| n/a                                 | Involvement in the study                           |
| <input checked="" type="checkbox"/> | <input type="checkbox"/> ChIP-seq                  |
| <input type="checkbox"/>            | <input checked="" type="checkbox"/> Flow cytometry |
| <input checked="" type="checkbox"/> | <input type="checkbox"/> MRI-based neuroimaging    |

## Antibodies

Antibodies used

CD36 - Proteintech (Cat. no. 18836-1-AP), Vimentin - Proteintech (Cat. no. 60330-1-Ig), ZEB1 - Sigma-Aldrich (Cat. no. HPA027524), E-cadherin - Cell Signalling (cat. no. 3195), CD44 - Cell Signalling (Cat. no. 3570), CD133- Abcam (Cat. no. Ab19898), ALDH - BD (Cat. no. 611195), AKT - Cell Signalling (cat. no. 9272), pAKT (ser473) - Cell Signalling (Cat. no. 9271), pAKT (Thr308) - cell Signalling (cat. no. 5106), ERK1/2 - Cell Signalling (cat. no. 9102), pERK1/2 (Thr202/Tyr204) - Cell Signalling (cat. no. 9191), P38-MAPK - Santa cruz (cat. no. Sc-728), pP38-MAPK - Cell Signalling (Cat. no. 9211), SMAD 2/3 - Cell Signalling (cat. no. 3102), pSMAD2/3 - Cell Signalling (Cat. no. 8828), STAT3 - Cell Signalling (Cat. no. 9139), pSTAT3 (Y705) - Abcam (Cat. no. Ab76315), AMPK - ThermoFisher (Cat. no. MA5-15815), pAMPK (Thr172) - ThermoFisher (Cat. no. 44-1150G), ACC - Abcam (Cat. no. Ab70246), pACC (Ser79) - Cell Signalling (Cat. no. 11818), ATGL - Abcam (Cat. no. Ab207799), FASN - Abcam (Cat. no. Ab128856), PPAR-a - Santa Cruz (Cat. no. Sc-398394), PPAR-b - Santa Cruz (Cat. no. Sc-74440), PPAR-g - Cell Signalling (Cat. no. 2435), FABP4 - Santa Cruz (Cat. no. Sc-271529), BAX - Cell Signalling (Cat. no. 2772), BCL-xL - Cell Signalling BCL-xL Cell Signalling (Cat. no. 2762), Caspase 3 - Cell Signalling (Cat. no. 9662), CL-Cas3 - Cell Signalling (Cat. no. 9661), PUMA - Santa Cruz (Cat. no. sc-374223), GST - Abcam (Cat. no. Ab19256), AlexaFluor 647 - abcam (Cat. no. Ab150083), Alexafluor 488 - Abcam (Cat. no. Ab150077), IgG (Mouse) - Santa cruz (Cat. no. Sc-2005), IgG (Rabbit) - Santa cruz (Cat. no. Sc-2004), a-lamin - Santa Cruz (Cat. no. Sc-518013), Actin - Santa Cruz (Cat. no. Sc-47778).

Validation

Each antibody was validated by data sheet from the manufacturer, literature's citations and previously published articles from the same group.

## Eukaryotic cell lines

Policy information about [cell lines](#)

Cell line source(s)

Cell lines were purchased from ATCC.

|                                                                      |                                                        |
|----------------------------------------------------------------------|--------------------------------------------------------|
| Authentication                                                       | ATCC authenticated, and observation of morphology.     |
| Mycoplasma contamination                                             | Cell lines were negative for mycoplasma contamination. |
| Commonly misidentified lines<br>(See <a href="#">ICLAC</a> register) | No cell lines listed by ICLAC were used.               |

## Animals and other organisms

Policy information about [studies involving animals](#); [ARRIVE guidelines](#) recommended for reporting animal research

|                         |                                                             |
|-------------------------|-------------------------------------------------------------|
| Laboratory animals      | The study did not involve laboratory animals                |
| Wild animals            | The study did not involve wild animals.                     |
| Field-collected samples | The study did not involve samples collected from the field. |
| Ethics oversight        | N/A                                                         |

Note that full information on the approval of the study protocol must also be provided in the manuscript.

## Clinical data

Policy information about [clinical studies](#)

All manuscripts should comply with the ICMJE [guidelines for publication of clinical research](#) and a completed [CONSORT checklist](#) must be included with all submissions.

|                             |                                                                                                                          |
|-----------------------------|--------------------------------------------------------------------------------------------------------------------------|
| Clinical trial registration | <i>Provide the trial registration number from ClinicalTrials.gov or an equivalent agency.</i>                            |
| Study protocol              | <i>Note where the full trial protocol can be accessed OR if not available, explain why.</i>                              |
| Data collection             | <i>Describe the settings and locales of data collection, noting the time periods of recruitment and data collection.</i> |
| Outcomes                    | <i>Describe how you pre-defined primary and secondary outcome measures and how you assessed these measures.</i>          |

## Flow Cytometry

### Plots

Confirm that:

- The axis labels state the marker and fluorochrome used (e.g. CD4-FITC).
- The axis scales are clearly visible. Include numbers along axes only for bottom left plot of group (a 'group' is an analysis of identical markers).
- All plots are contour plots with outliers or pseudocolor plots.
- A numerical value for number of cells or percentage (with statistics) is provided.

### Methodology

|                           |                                                                                                                                                                                                                                                                                                                                                                                                                                                                                                                                                                                                      |
|---------------------------|------------------------------------------------------------------------------------------------------------------------------------------------------------------------------------------------------------------------------------------------------------------------------------------------------------------------------------------------------------------------------------------------------------------------------------------------------------------------------------------------------------------------------------------------------------------------------------------------------|
| Sample preparation        | To determine the proportion of CD36/CD44 expressing cells, cells co-cultured and control cells were harvested and resuspended to approximately 1-5x10 <sup>6</sup> cells /ml in ice cold PBS. Cells are fixed with 4% formaldehyde for 15 mins at room temperature. Cells are resuspended in 100ul BSA/PBS and incubated with primary antibodies against CD36 and CD44 and for 1hr at room temperature. Cells are rinsed 3X and resuspended in ice cold PBS. Cells are incubated with Alexa Fluor 488 and Alexa Fluor 647-conjugated secondary antibody for another 30 minutes, rinsed and analysed. |
| Instrument                | BD FACSAria™ III (BD Biosciences, San Jose, USA)                                                                                                                                                                                                                                                                                                                                                                                                                                                                                                                                                     |
| Software                  | Flowing software 2                                                                                                                                                                                                                                                                                                                                                                                                                                                                                                                                                                                   |
| Cell population abundance | Followed the manufacturer's instruction                                                                                                                                                                                                                                                                                                                                                                                                                                                                                                                                                              |
| Gating strategy           | Gating boundaries were designed equally in all of analyses.                                                                                                                                                                                                                                                                                                                                                                                                                                                                                                                                          |

Tick this box to confirm that a figure exemplifying the gating strategy is provided in the Supplementary Information.
